# Supplementary material
Source: publisher figshare collection journal article supplement (https://acs.figshare.com/ndownloader/files/4272566)
Supplement: Supplementary file 1 [file 4272566]

  
data_mlo1 
  
_audit_creation_method            SHELXL-97 
_chemical_name_systematic 
; 
 ? 
; 
_chemical_name_common             ? 
_chemical_melting_point           ? 
_chemical_formula_moiety          ? 
_chemical_formula_sum 
 'C76 H68 N14 O7 S2' 
_chemical_formula_weight          1353.56 
  
loop_ 
 _atom_type_symbol 
 _atom_type_description 
 _atom_type_scat_dispersion_real 
 _atom_type_scat_dispersion_imag 
 _atom_type_scat_source 
 'C'  'C'   0.0033   0.0016 
 'International Tables Vol C Tables 4.2.6.8 and 6.1.1.4' 
 'H'  'H'   0.0000   0.0000 
 'International Tables Vol C Tables 4.2.6.8 and 6.1.1.4' 
 'N'  'N'   0.0061   0.0033 
 'International Tables Vol C Tables 4.2.6.8 and 6.1.1.4' 
 'O'  'O'   0.0106   0.0060 
 'International Tables Vol C Tables 4.2.6.8 and 6.1.1.4' 
 'S'  'S'   0.1246   0.1234 
 'International Tables Vol C Tables 4.2.6.8 and 6.1.1.4' 
  
_symmetry_cell_setting            Monoclinic 
_symmetry_space_group_name_H-M    C2/c 
  
loop_ 
 _symmetry_equiv_pos_as_xyz 
 'x, y, z' 
 '-x, y, -z+1/2' 
 'x+1/2, y+1/2, z' 
 '-x+1/2, y+1/2, -z+1/2' 
 '-x, -y, -z' 
 'x, -y, z-1/2' 
 '-x+1/2, -y+1/2, -z' 
 'x+1/2, -y+1/2, z-1/2' 
  
_cell_length_a                    37.0092(16) 
_cell_length_b                    13.0987(4) 
_cell_length_c                    14.0975(5) 
_cell_angle_alpha                 90.00 
_cell_angle_beta                  95.401(3) 
_cell_angle_gamma                 90.00 
_cell_volume                      6803.7(4) 
_cell_formula_units_Z             4 
_cell_measurement_temperature     296(2) 
_cell_measurement_reflns_used     ? 
_cell_measurement_theta_min       ? 
_cell_measurement_theta_max       ? 
  
_exptl_crystal_description        prismatic 
_exptl_crystal_colour             yellow
_exptl_crystal_size_max           0.45
_exptl_crystal_size_mid           0.20
_exptl_crystal_size_min           0.08
_exptl_crystal_density_meas       ? 
_exptl_crystal_density_diffrn     1.321 
_exptl_crystal_density_method     'not measured' 
_exptl_crystal_F_000              2840 
_exptl_absorpt_coefficient_mu     0.146 
_exptl_absorpt_correction_type    none 
_exptl_absorpt_correction_T_min   ? 
_exptl_absorpt_correction_T_max   ? 
_exptl_absorpt_process_details    ? 
  
_exptl_special_details 
; 
 ? 
; 
  
_diffrn_ambient_temperature       296(2) 
_diffrn_radiation_wavelength      0.71073 
_diffrn_radiation_type            MoK\a 
_diffrn_radiation_source          'fine-focus sealed tube' 
_diffrn_radiation_monochromator   graphite 
_diffrn_measurement_device_type   'CCD area detector' 
_diffrn_measurement_method        'phi and omega scans' 
_diffrn_detector_area_resol_mean  ? 
_diffrn_standards_number          ? 
_diffrn_standards_interval_count  ? 
_diffrn_standards_interval_time   ? 
_diffrn_standards_decay_%         ? 
_diffrn_reflns_number             15263 
_diffrn_reflns_av_R_equivalents   0.0219 
_diffrn_reflns_av_sigmaI/netI     0.0364 
_diffrn_reflns_limit_h_min        -32 
_diffrn_reflns_limit_h_max        44 
_diffrn_reflns_limit_k_min        -13 
_diffrn_reflns_limit_k_max        15 
_diffrn_reflns_limit_l_min        -15 
_diffrn_reflns_limit_l_max        16 
_diffrn_reflns_theta_min          2.61 
_diffrn_reflns_theta_max          25.00 
_reflns_number_total              5999 
_reflns_number_gt                 3892 
_reflns_threshold_expression      >2sigma(I) 
  
_computing_data_collection        'Bruker SMART' 
_computing_cell_refinement        'Bruker SMART' 
_computing_data_reduction         'Bruker SAINT' 
_computing_structure_solution     'SHELXS-97 (Sheldrick, 1990)' 
_computing_structure_refinement   'SHELXL-97 (Sheldrick, 1997)' 
_computing_molecular_graphics     'Bruker SHELXTL' 
_computing_publication_material   'Bruker SHELXTL' 
  
_refine_special_details 
; 
 Refinement of F^2^ against ALL reflections.  The weighted R-factor wR and 
 goodness of fit S are based on F^2^, conventional R-factors R are based 
 on F, with F set to zero for negative F^2^. The threshold expression of 
 F^2^ > 2sigma(F^2^) is used only for calculating R-factors(gt) etc. and is 
 not relevant to the choice of reflections for refinement.  R-factors based 
 on F^2^ are statistically about twice as large as those based on F, and R- 
 factors based on ALL data will be even larger. 
; 
  
_refine_ls_structure_factor_coef  Fsqd 
_refine_ls_matrix_type            full 
_refine_ls_weighting_scheme       calc 
_refine_ls_weighting_details 
 'calc w=1/[\s^2^(Fo^2^)+(0.1000P)^2^+0.0000P] where P=(Fo^2^+2Fc^2^)/3' 
_atom_sites_solution_primary      direct 
_atom_sites_solution_secondary    difmap 
_atom_sites_solution_hydrogens    geom 
_refine_ls_hydrogen_treatment     constr 
_refine_ls_extinction_method      none 
_refine_ls_extinction_coef        ? 
_refine_ls_number_reflns          5999 
_refine_ls_number_parameters      447 
_refine_ls_number_restraints      0 
_refine_ls_R_factor_all           0.0820 
_refine_ls_R_factor_gt            0.0535 
_refine_ls_wR_factor_ref          0.1688 
_refine_ls_wR_factor_gt           0.1576 
_refine_ls_goodness_of_fit_ref    1.093 
_refine_ls_restrained_S_all       1.093 
_refine_ls_shift/su_max           0.001 
_refine_ls_shift/su_mean          0.000 
  
loop_ 
 _atom_site_label 
 _atom_site_type_symbol 
 _atom_site_fract_x 
 _atom_site_fract_y 
 _atom_site_fract_z 
 _atom_site_U_iso_or_equiv 
 _atom_site_adp_type 
 _atom_site_occupancy 
 _atom_site_symmetry_multiplicity 
 _atom_site_calc_flag 
 _atom_site_refinement_flags 
 _atom_site_disorder_assembly 
 _atom_site_disorder_group 
C1 C 0.16110(7) 0.53359(19) 0.58979(18) 0.0426(6) Uani 1 1 d . . . 
N1 N 0.16462(6) 0.62939(15) 0.55380(14) 0.0445(6) Uani 1 1 d . . . 
H1 H 0.1504 0.6446 0.5036 0.053 Uiso 1 1 d . . . 
O1 O 0.18307(5) 0.49652(13) 0.64934(15) 0.0649(6) Uani 1 1 d . . . 
S1 S 0.09160(2) 0.80053(6) 0.38842(6) 0.0607(3) Uani 1 1 d . . . 
C2 C 0.19186(7) 0.70114(18) 0.57950(17) 0.0393(6) Uani 1 1 d . . . 
N2 N 0.19255(6) 0.77742(15) 0.51991(14) 0.0425(5) Uani 1 1 d . . . 
O2 O 0.03262(5) 0.56114(13) 0.41287(13) 0.0529(5) Uani 1 1 d . . . 
C3 C 0.21521(7) 0.6933(2) 0.66559(18) 0.0463(7) Uani 1 1 d . . . 
H3A H 0.2140 0.6378 0.7062 0.056 Uiso 1 1 calc R . . 
N3 N 0.21659(6) 0.93011(16) 0.47425(16) 0.0509(6) Uani 1 1 d . . . 
O3 O 0.10754(5) 0.69920(13) 0.41639(14) 0.0580(5) Uani 1 1 d . . . 
C4 C 0.23914(7) 0.7696(2) 0.6858(2) 0.0508(7) Uani 1 1 d . . . 
H4B H 0.2544 0.7675 0.7421 0.061 Uiso 1 1 calc R . . 
N4 N 0.09877(5) 0.51388(14) 0.50185(13) 0.0379(5) Uani 1 1 d . . . 
H4 H 0.0949 0.5807 0.4787 0.046 Uiso 1 1 d . . . 
O4 O 0.0000 0.1071(4) 0.2500 0.1428(19) Uani 1 2 d S . . 
H4A H 0.0204 0.0782 0.2465 0.171 Uiso 1 1 d . . . 
C5 C 0.24154(7) 0.8523(2) 0.62322(19) 0.0464(7) Uani 1 1 d . . . 
N5 N 0.01437(6) 0.39523(15) 0.40799(14) 0.0429(5) Uani 1 1 d . . . 
H5 H 0.0205 0.3304 0.4320 0.052 Uiso 1 1 d . . . 
C6 C 0.26646(8) 0.9340(2) 0.6363(2) 0.0614(8) Uani 1 1 d . . . 
H6A H 0.2831 0.9364 0.6901 0.074 Uiso 1 1 calc R . . 
N6 N -0.03579(6) 0.31026(16) 0.34767(15) 0.0483(6) Uani 1 1 d . . . 
C7 C 0.26590(8) 1.0080(2) 0.5703(2) 0.0631(8) Uani 1 1 d . . . 
H7A H 0.2824 1.0616 0.5779 0.076 Uiso 1 1 calc R . . 
N7 N -0.08467(7) 0.21084(19) 0.29402(18) 0.0657(7) Uani 1 1 d . . . 
C8 C 0.24029(8) 1.0049(2) 0.4892(2) 0.0560(7) Uani 1 1 d . . . 
C9 C 0.21741(7) 0.85312(19) 0.53991(18) 0.0420(6) Uani 1 1 d . . . 
C10 C 0.23857(10) 1.0894(2) 0.4178(3) 0.0791(10) Uani 1 1 d . . . 
H10A H 0.2198 1.0752 0.3678 0.119 Uiso 1 1 calc R . . 
H10B H 0.2615 1.0949 0.3914 0.119 Uiso 1 1 calc R . . 
H10C H 0.2333 1.1525 0.4484 0.119 Uiso 1 1 calc R . . 
C11 C 0.12831(7) 0.47452(18) 0.55490(16) 0.0391(6) Uani 1 1 d . . . 
C12 C 0.12141(7) 0.37239(18) 0.57178(16) 0.0382(6) Uani 1 1 d . . . 
C13 C 0.08633(7) 0.34993(18) 0.52735(16) 0.0371(6) Uani 1 1 d . . . 
C14 C 0.07308(7) 0.44031(18) 0.48383(16) 0.0375(6) Uani 1 1 d . . . 
C15 C 0.03849(7) 0.47198(19) 0.43254(15) 0.0383(6) Uani 1 1 d . . . 
C16 C -0.02014(7) 0.4004(2) 0.35788(16) 0.0409(6) Uani 1 1 d . . . 
C17 C -0.03592(7) 0.4924(2) 0.32191(16) 0.0439(6) Uani 1 1 d . . . 
H17A H -0.0238 0.5544 0.3312 0.053 Uiso 1 1 calc R . . 
C18 C -0.06931(7) 0.4873(2) 0.27337(18) 0.0504(7) Uani 1 1 d . . . 
H18A H -0.0803 0.5464 0.2478 0.060 Uiso 1 1 calc R . . 
C19 C -0.08747(7) 0.3930(2) 0.26156(17) 0.0489(7) Uani 1 1 d . . . 
C20 C -0.12220(8) 0.3794(3) 0.2126(2) 0.0654(9) Uani 1 1 d . . . 
H20A H -0.1347 0.4349 0.1846 0.078 Uiso 1 1 calc R . . 
C21 C -0.13692(9) 0.2863(3) 0.2068(2) 0.0721(10) Uani 1 1 d . . . 
H21A H -0.1599 0.2767 0.1751 0.086 Uiso 1 1 calc R . . 
C22 C -0.11766(10) 0.2026(3) 0.2487(2) 0.0742(10) Uani 1 1 d . . . 
C23 C -0.06951(7) 0.3061(2) 0.30045(17) 0.0480(7) Uani 1 1 d . . . 
C24 C -0.13444(12) 0.0969(3) 0.2454(3) 0.1130(16) Uani 1 1 d . . . 
H24A H -0.1177 0.0494 0.2775 0.169 Uiso 1 1 calc R . . 
H24B H -0.1397 0.0762 0.1802 0.169 Uiso 1 1 calc R . . 
H24C H -0.1565 0.0981 0.2763 0.169 Uiso 1 1 calc R . . 
C25 C 0.14474(7) 0.29326(18) 0.62278(18) 0.0420(6) Uani 1 1 d . . . 
C26 C 0.15327(7) 0.2953(2) 0.72088(18) 0.0469(7) Uani 1 1 d . . . 
H26A H 0.1464 0.3511 0.7558 0.056 Uiso 1 1 calc R . . 
C27 C 0.17181(8) 0.2158(2) 0.7672(2) 0.0585(8) Uani 1 1 d . . . 
H27A H 0.1773 0.2183 0.8329 0.070 Uiso 1 1 calc R . . 
C28 C 0.18225(8) 0.1335(2) 0.7171(3) 0.0704(10) Uani 1 1 d . . . 
H28A H 0.1949 0.0802 0.7486 0.084 Uiso 1 1 calc R . . 
C29 C 0.17407(9) 0.1296(2) 0.6202(3) 0.0745(10) Uani 1 1 d . . . 
H29A H 0.1811 0.0735 0.5860 0.089 Uiso 1 1 calc R . . 
C30 C 0.15527(9) 0.2092(2) 0.5733(2) 0.0598(8) Uani 1 1 d . . . 
H30A H 0.1497 0.2059 0.5077 0.072 Uiso 1 1 calc R . . 
C31 C 0.06848(7) 0.25045(18) 0.53564(17) 0.0397(6) Uani 1 1 d . . . 
C32 C 0.06256(8) 0.2141(2) 0.62519(19) 0.0502(7) Uani 1 1 d . . . 
H32A H 0.0683 0.2551 0.6783 0.060 Uiso 1 1 calc R . . 
C33 C 0.04831(9) 0.1180(2) 0.6369(2) 0.0598(8) Uani 1 1 d . . . 
H33A H 0.0446 0.0945 0.6974 0.072 Uiso 1 1 calc R . . 
C34 C 0.03954(8) 0.0568(2) 0.5578(2) 0.0629(9) Uani 1 1 d . . . 
H34A H 0.0305 -0.0086 0.5654 0.076 Uiso 1 1 calc R . . 
C35 C 0.04416(8) 0.0922(2) 0.4694(2) 0.0562(8) Uani 1 1 d . . . 
H35A H 0.0373 0.0518 0.4166 0.067 Uiso 1 1 calc R . . 
C36 C 0.05895(7) 0.18775(19) 0.45677(19) 0.0477(7) Uani 1 1 d . . . 
H36A H 0.0626 0.2103 0.3958 0.057 Uiso 1 1 calc R . . 
C37 C 0.11257(11) 0.8911(3) 0.4654(4) 0.1072(15) Uani 1 1 d . . . 
H37A H 0.1375 0.8988 0.4527 0.161 Uiso 1 1 calc R . . 
H37B H 0.1115 0.8692 0.5301 0.161 Uiso 1 1 calc R . . 
H37C H 0.1003 0.9554 0.4560 0.161 Uiso 1 1 calc R . . 
C38 C 0.04738(9) 0.8026(2) 0.4274(3) 0.0803(11) Uani 1 1 d . . . 
H38A H 0.0321 0.7553 0.3903 0.120 Uiso 1 1 calc R . . 
H38B H 0.0374 0.8701 0.4196 0.120 Uiso 1 1 calc R . . 
H38C H 0.0487 0.7836 0.4934 0.120 Uiso 1 1 calc R . . 
  
loop_ 
 _atom_site_aniso_label 
 _atom_site_aniso_U_11 
 _atom_site_aniso_U_22 
 _atom_site_aniso_U_33 
 _atom_site_aniso_U_23 
 _atom_site_aniso_U_13 
 _atom_site_aniso_U_12 
C1 0.0388(15) 0.0427(14) 0.0453(14) 0.0000(12) -0.0014(12) -0.0006(12) 
N1 0.0404(13) 0.0458(12) 0.0444(12) 0.0063(10) -0.0114(10) -0.0064(10) 
O1 0.0514(12) 0.0551(12) 0.0816(14) 0.0202(11) -0.0283(11) -0.0067(10) 
S1 0.0613(5) 0.0558(5) 0.0634(5) 0.0109(4) -0.0021(4) 0.0062(4) 
C2 0.0333(15) 0.0418(14) 0.0419(13) -0.0043(12) -0.0016(11) -0.0004(11) 
N2 0.0382(13) 0.0430(11) 0.0446(11) -0.0011(10) -0.0045(9) -0.0046(10) 
O2 0.0503(12) 0.0407(10) 0.0645(12) -0.0019(9) -0.0110(9) 0.0012(9) 
C3 0.0412(16) 0.0511(16) 0.0448(14) 0.0012(13) -0.0064(12) -0.0002(13) 
N3 0.0486(15) 0.0468(13) 0.0569(13) 0.0003(11) 0.0023(11) -0.0039(11) 
O3 0.0490(12) 0.0478(11) 0.0758(13) 0.0184(10) -0.0008(10) 0.0049(9) 
C4 0.0437(17) 0.0574(16) 0.0484(15) -0.0078(14) -0.0116(13) 0.0028(14) 
N4 0.0386(12) 0.0359(11) 0.0379(10) 0.0012(9) -0.0041(9) 0.0002(9) 
O4 0.202(5) 0.132(4) 0.090(3) 0.000 -0.010(3) 0.000 
C5 0.0355(16) 0.0466(15) 0.0560(15) -0.0104(13) -0.0023(12) 0.0000(12) 
N5 0.0371(13) 0.0419(11) 0.0479(12) 0.0054(10) -0.0060(10) -0.0028(10) 
C6 0.0476(19) 0.0590(18) 0.075(2) -0.0158(17) -0.0100(15) -0.0081(15) 
N6 0.0444(14) 0.0524(13) 0.0470(12) 0.0018(11) -0.0021(10) -0.0072(11) 
C7 0.0500(19) 0.0499(17) 0.088(2) -0.0073(17) -0.0005(16) -0.0118(15) 
N7 0.0608(17) 0.0754(17) 0.0588(15) -0.0091(13) -0.0052(13) -0.0226(14) 
C8 0.0487(18) 0.0460(16) 0.0740(19) -0.0053(15) 0.0091(15) -0.0062(14) 
C9 0.0346(15) 0.0437(14) 0.0474(14) -0.0074(13) 0.0015(11) 0.0010(12) 
C10 0.078(3) 0.060(2) 0.099(3) 0.0148(19) 0.007(2) -0.0133(18) 
C11 0.0384(15) 0.0416(14) 0.0362(12) 0.0003(11) -0.0015(11) 0.0006(11) 
C12 0.0379(15) 0.0418(14) 0.0345(12) 0.0002(11) 0.0008(10) -0.0012(11) 
C13 0.0387(15) 0.0396(13) 0.0330(12) -0.0022(11) 0.0031(10) -0.0002(11) 
C14 0.0376(14) 0.0411(13) 0.0332(12) -0.0012(11) 0.0003(10) -0.0031(12) 
C15 0.0391(15) 0.0449(15) 0.0308(12) -0.0002(12) 0.0026(10) 0.0002(12) 
C16 0.0359(15) 0.0533(16) 0.0333(12) -0.0011(12) 0.0026(11) -0.0021(13) 
C17 0.0402(15) 0.0516(15) 0.0394(13) -0.0003(12) 0.0009(11) 0.0004(13) 
C18 0.0444(17) 0.0669(18) 0.0396(13) -0.0018(13) 0.0024(12) 0.0083(15) 
C19 0.0383(16) 0.0738(19) 0.0346(13) -0.0059(13) 0.0043(11) -0.0025(14) 
C20 0.0425(18) 0.102(3) 0.0510(17) -0.0127(17) -0.0003(14) 0.0023(18) 
C21 0.0422(19) 0.116(3) 0.0571(18) -0.017(2) -0.0024(15) -0.015(2) 
C22 0.062(2) 0.100(3) 0.0605(19) -0.0188(19) 0.0048(17) -0.030(2) 
C23 0.0422(16) 0.0654(18) 0.0363(13) -0.0051(13) 0.0035(12) -0.0096(14) 
C24 0.100(3) 0.113(3) 0.121(3) -0.020(3) -0.016(3) -0.060(3) 
C25 0.0343(15) 0.0443(14) 0.0470(14) 0.0044(12) 0.0017(11) -0.0006(12) 
C26 0.0403(16) 0.0520(16) 0.0470(15) 0.0044(13) -0.0031(12) 0.0008(13) 
C27 0.0494(19) 0.069(2) 0.0545(16) 0.0160(16) -0.0072(14) -0.0050(16) 
C28 0.053(2) 0.0557(19) 0.099(3) 0.0226(19) -0.0110(18) 0.0032(16) 
C29 0.072(2) 0.0549(19) 0.097(3) -0.0064(18) 0.007(2) 0.0188(17) 
C30 0.066(2) 0.0541(17) 0.0585(17) -0.0011(15) 0.0033(15) 0.0116(16) 
C31 0.0375(15) 0.0383(13) 0.0421(14) -0.0011(12) -0.0022(11) 0.0007(12) 
C32 0.0561(18) 0.0501(16) 0.0431(14) -0.0010(13) -0.0016(13) -0.0113(14) 
C33 0.064(2) 0.0567(17) 0.0573(17) 0.0090(15) -0.0009(15) -0.0109(16) 
C34 0.057(2) 0.0436(16) 0.085(2) 0.0017(16) -0.0092(17) -0.0104(14) 
C35 0.057(2) 0.0422(16) 0.0674(19) -0.0115(15) -0.0058(15) -0.0016(14) 
C36 0.0496(17) 0.0447(15) 0.0476(15) -0.0027(12) -0.0010(13) 0.0018(13) 
C37 0.072(3) 0.067(2) 0.178(4) -0.021(3) -0.014(3) -0.001(2) 
C38 0.049(2) 0.061(2) 0.132(3) 0.002(2) 0.013(2) 0.0050(16) 
  
_geom_special_details 
; 
 All esds (except the esd in the dihedral angle between two l.s. planes) 
 are estimated using the full covariance matrix.  The cell esds are taken 
 into account individually in the estimation of esds in distances, angles 
 and torsion angles; correlations between esds in cell parameters are only 
 used when they are defined by crystal symmetry.  An approximate (isotropic) 
 treatment of cell esds is used for estimating esds involving l.s. planes. 
; 
  
loop_ 
 _geom_bond_atom_site_label_1 
 _geom_bond_atom_site_label_2 
 _geom_bond_distance 
 _geom_bond_site_symmetry_2 
 _geom_bond_publ_flag 
C1 O1 1.214(3) . ? 
C1 N1 1.364(3) . ? 
C1 C11 1.484(3) . ? 
N1 C2 1.401(3) . ? 
N1 H1 0.8646 . ? 
S1 O3 1.4905(18) . ? 
S1 C37 1.741(4) . ? 
S1 C38 1.775(4) . ? 
C2 N2 1.307(3) . ? 
C2 C3 1.426(3) . ? 
N2 C9 1.364(3) . ? 
O2 C15 1.215(3) . ? 
C3 C4 1.348(4) . ? 
C3 H3A 0.9300 . ? 
N3 C8 1.319(3) . ? 
N3 C9 1.367(3) . ? 
C4 C5 1.405(4) . ? 
C4 H4B 0.9300 . ? 
N4 C14 1.361(3) . ? 
N4 C11 1.366(3) . ? 
N4 H4 0.9404 . ? 
O4 H4A 0.8501 . ? 
C5 C6 1.413(4) . ? 
C5 C9 1.407(3) . ? 
N5 C15 1.367(3) . ? 
N5 C16 1.402(3) . ? 
N5 H5 0.9342 . ? 
C6 C7 1.343(4) . ? 
C6 H6A 0.9300 . ? 
N6 C16 1.317(3) . ? 
N6 C23 1.359(3) . ? 
C7 C8 1.416(4) . ? 
C7 H7A 0.9300 . ? 
N7 C22 1.328(4) . ? 
N7 C23 1.367(3) . ? 
C8 C10 1.493(4) . ? 
C10 H10A 0.9600 . ? 
C10 H10B 0.9600 . ? 
C10 H10C 0.9600 . ? 
C11 C12 1.387(3) . ? 
C12 C13 1.418(3) . ? 
C12 C25 1.490(3) . ? 
C13 C14 1.401(3) . ? 
C13 C31 1.471(3) . ? 
C14 C15 1.469(3) . ? 
C16 C17 1.413(3) . ? 
C17 C18 1.356(4) . ? 
C17 H17A 0.9300 . ? 
C18 C19 1.409(4) . ? 
C18 H18A 0.9300 . ? 
C19 C23 1.404(4) . ? 
C19 C20 1.412(4) . ? 
C20 C21 1.335(4) . ? 
C20 H20A 0.9300 . ? 
C21 C22 1.407(5) . ? 
C21 H21A 0.9300 . ? 
C22 C24 1.517(5) . ? 
C24 H24A 0.9600 . ? 
C24 H24B 0.9600 . ? 
C24 H24C 0.9600 . ? 
C25 C30 1.379(4) . ? 
C25 C26 1.389(3) . ? 
C26 C27 1.377(4) . ? 
C26 H26A 0.9300 . ? 
C27 C28 1.364(4) . ? 
C27 H27A 0.9300 . ? 
C28 C29 1.372(5) . ? 
C28 H28A 0.9300 . ? 
C29 C30 1.387(4) . ? 
C29 H29A 0.9300 . ? 
C30 H30A 0.9300 . ? 
C31 C32 1.386(4) . ? 
C31 C36 1.401(3) . ? 
C32 C33 1.380(4) . ? 
C32 H32A 0.9300 . ? 
C33 C34 1.386(4) . ? 
C33 H33A 0.9300 . ? 
C34 C35 1.355(4) . ? 
C34 H34A 0.9300 . ? 
C35 C36 1.384(4) . ? 
C35 H35A 0.9300 . ? 
C36 H36A 0.9300 . ? 
C37 H37A 0.9600 . ? 
C37 H37B 0.9600 . ? 
C37 H37C 0.9600 . ? 
C38 H38A 0.9600 . ? 
C38 H38B 0.9600 . ? 
C38 H38C 0.9600 . ? 
  
loop_ 
 _geom_angle_atom_site_label_1 
 _geom_angle_atom_site_label_2 
 _geom_angle_atom_site_label_3 
 _geom_angle 
 _geom_angle_site_symmetry_1 
 _geom_angle_site_symmetry_3 
 _geom_angle_publ_flag 
O1 C1 N1 123.0(2) . . ? 
O1 C1 C11 119.6(2) . . ? 
N1 C1 C11 117.4(2) . . ? 
C1 N1 C2 127.78(19) . . ? 
C1 N1 H1 116.4 . . ? 
C2 N1 H1 115.1 . . ? 
O3 S1 C37 107.46(16) . . ? 
O3 S1 C38 106.58(14) . . ? 
C37 S1 C38 99.6(2) . . ? 
N2 C2 N1 113.82(19) . . ? 
N2 C2 C3 123.7(2) . . ? 
N1 C2 C3 122.4(2) . . ? 
C2 N2 C9 118.5(2) . . ? 
C4 C3 C2 117.4(2) . . ? 
C4 C3 H3A 121.3 . . ? 
C2 C3 H3A 121.3 . . ? 
C8 N3 C9 117.9(2) . . ? 
C3 C4 C5 121.2(2) . . ? 
C3 C4 H4B 119.4 . . ? 
C5 C4 H4B 119.4 . . ? 
C14 N4 C11 110.12(18) . . ? 
C14 N4 H4 120.9 . . ? 
C11 N4 H4 129.0 . . ? 
C4 C5 C6 125.5(2) . . ? 
C4 C5 C9 117.2(2) . . ? 
C6 C5 C9 117.3(3) . . ? 
C15 N5 C16 129.4(2) . . ? 
C15 N5 H5 116.5 . . ? 
C16 N5 H5 113.9 . . ? 
C7 C6 C5 119.2(3) . . ? 
C7 C6 H6A 120.4 . . ? 
C5 C6 H6A 120.4 . . ? 
C16 N6 C23 117.6(2) . . ? 
C6 C7 C8 120.3(3) . . ? 
C6 C7 H7A 119.8 . . ? 
C8 C7 H7A 119.8 . . ? 
C22 N7 C23 117.3(3) . . ? 
N3 C8 C7 122.3(3) . . ? 
N3 C8 C10 117.2(3) . . ? 
C7 C8 C10 120.4(3) . . ? 
N3 C9 N2 115.1(2) . . ? 
N3 C9 C5 122.9(2) . . ? 
N2 C9 C5 122.0(2) . . ? 
C8 C10 H10A 109.5 . . ? 
C8 C10 H10B 109.5 . . ? 
H10A C10 H10B 109.5 . . ? 
C8 C10 H10C 109.5 . . ? 
H10A C10 H10C 109.5 . . ? 
H10B C10 H10C 109.5 . . ? 
N4 C11 C12 107.9(2) . . ? 
N4 C11 C1 124.9(2) . . ? 
C12 C11 C1 127.2(2) . . ? 
C11 C12 C13 107.5(2) . . ? 
C11 C12 C25 130.3(2) . . ? 
C13 C12 C25 122.3(2) . . ? 
C14 C13 C12 106.6(2) . . ? 
C14 C13 C31 130.0(2) . . ? 
C12 C13 C31 123.2(2) . . ? 
N4 C14 C13 107.9(2) . . ? 
N4 C14 C15 116.9(2) . . ? 
C13 C14 C15 135.0(2) . . ? 
O2 C15 N5 123.4(2) . . ? 
O2 C15 C14 120.8(2) . . ? 
N5 C15 C14 115.8(2) . . ? 
N6 C16 N5 112.5(2) . . ? 
N6 C16 C17 124.3(2) . . ? 
N5 C16 C17 123.3(2) . . ? 
C18 C17 C16 117.8(2) . . ? 
C18 C17 H17A 121.1 . . ? 
C16 C17 H17A 121.1 . . ? 
C17 C18 C19 120.3(3) . . ? 
C17 C18 H18A 119.9 . . ? 
C19 C18 H18A 119.9 . . ? 
C23 C19 C18 117.5(2) . . ? 
C23 C19 C20 117.7(3) . . ? 
C18 C19 C20 124.8(3) . . ? 
C21 C20 C19 119.5(3) . . ? 
C21 C20 H20A 120.2 . . ? 
C19 C20 H20A 120.2 . . ? 
C20 C21 C22 119.9(3) . . ? 
C20 C21 H21A 120.1 . . ? 
C22 C21 H21A 120.1 . . ? 
N7 C22 C21 123.1(3) . . ? 
N7 C22 C24 116.4(3) . . ? 
C21 C22 C24 120.6(3) . . ? 
N6 C23 N7 114.9(2) . . ? 
N6 C23 C19 122.5(2) . . ? 
N7 C23 C19 122.5(2) . . ? 
C22 C24 H24A 109.5 . . ? 
C22 C24 H24B 109.5 . . ? 
H24A C24 H24B 109.5 . . ? 
C22 C24 H24C 109.5 . . ? 
H24A C24 H24C 109.5 . . ? 
H24B C24 H24C 109.5 . . ? 
C30 C25 C26 118.0(2) . . ? 
C30 C25 C12 119.3(2) . . ? 
C26 C25 C12 122.3(2) . . ? 
C27 C26 C25 120.9(3) . . ? 
C27 C26 H26A 119.5 . . ? 
C25 C26 H26A 119.5 . . ? 
C28 C27 C26 120.3(3) . . ? 
C28 C27 H27A 119.8 . . ? 
C26 C27 H27A 119.8 . . ? 
C27 C28 C29 119.9(3) . . ? 
C27 C28 H28A 120.1 . . ? 
C29 C28 H28A 120.1 . . ? 
C30 C29 C28 120.0(3) . . ? 
C30 C29 H29A 120.0 . . ? 
C28 C29 H29A 120.0 . . ? 
C29 C30 C25 120.8(3) . . ? 
C29 C30 H30A 119.6 . . ? 
C25 C30 H30A 119.6 . . ? 
C32 C31 C36 118.2(2) . . ? 
C32 C31 C13 119.2(2) . . ? 
C36 C31 C13 122.5(2) . . ? 
C33 C32 C31 121.1(2) . . ? 
C33 C32 H32A 119.4 . . ? 
C31 C32 H32A 119.4 . . ? 
C32 C33 C34 119.6(3) . . ? 
C32 C33 H33A 120.2 . . ? 
C34 C33 H33A 120.2 . . ? 
C35 C34 C33 120.1(3) . . ? 
C35 C34 H34A 120.0 . . ? 
C33 C34 H34A 120.0 . . ? 
C34 C35 C36 120.9(3) . . ? 
C34 C35 H35A 119.6 . . ? 
C36 C35 H35A 119.6 . . ? 
C35 C36 C31 120.1(3) . . ? 
C35 C36 H36A 120.0 . . ? 
C31 C36 H36A 120.0 . . ? 
S1 C37 H37A 109.5 . . ? 
S1 C37 H37B 109.5 . . ? 
H37A C37 H37B 109.5 . . ? 
S1 C37 H37C 109.5 . . ? 
H37A C37 H37C 109.5 . . ? 
H37B C37 H37C 109.5 . . ? 
S1 C38 H38A 109.5 . . ? 
S1 C38 H38B 109.5 . . ? 
H38A C38 H38B 109.5 . . ? 
S1 C38 H38C 109.5 . . ? 
H38A C38 H38C 109.5 . . ? 
H38B C38 H38C 109.5 . . ? 
  
loop_ 
 _geom_torsion_atom_site_label_1 
 _geom_torsion_atom_site_label_2 
 _geom_torsion_atom_site_label_3 
 _geom_torsion_atom_site_label_4 
 _geom_torsion 
 _geom_torsion_site_symmetry_1 
 _geom_torsion_site_symmetry_2 
 _geom_torsion_site_symmetry_3 
 _geom_torsion_site_symmetry_4 
 _geom_torsion_publ_flag 
O1 C1 N1 C2 -2.6(4) . . . . ? 
C11 C1 N1 C2 176.1(2) . . . . ? 
C1 N1 C2 N2 166.4(3) . . . . ? 
C1 N1 C2 C3 -16.7(4) . . . . ? 
N1 C2 N2 C9 178.1(2) . . . . ? 
C3 C2 N2 C9 1.3(4) . . . . ? 
N2 C2 C3 C4 0.1(4) . . . . ? 
N1 C2 C3 C4 -176.4(2) . . . . ? 
C2 C3 C4 C5 -1.5(4) . . . . ? 
C3 C4 C5 C6 -177.7(3) . . . . ? 
C3 C4 C5 C9 1.3(4) . . . . ? 
C4 C5 C6 C7 179.6(3) . . . . ? 
C9 C5 C6 C7 0.5(4) . . . . ? 
C5 C6 C7 C8 0.9(5) . . . . ? 
C9 N3 C8 C7 -0.5(4) . . . . ? 
C9 N3 C8 C10 -178.8(3) . . . . ? 
C6 C7 C8 N3 -0.9(5) . . . . ? 
C6 C7 C8 C10 177.4(3) . . . . ? 
C8 N3 C9 N2 -179.2(2) . . . . ? 
C8 N3 C9 C5 2.0(4) . . . . ? 
C2 N2 C9 N3 179.8(2) . . . . ? 
C2 N2 C9 C5 -1.4(4) . . . . ? 
C4 C5 C9 N3 178.8(2) . . . . ? 
C6 C5 C9 N3 -2.0(4) . . . . ? 
C4 C5 C9 N2 0.1(4) . . . . ? 
C6 C5 C9 N2 179.3(2) . . . . ? 
C14 N4 C11 C12 -0.1(3) . . . . ? 
C14 N4 C11 C1 -178.4(2) . . . . ? 
O1 C1 C11 N4 167.6(3) . . . . ? 
N1 C1 C11 N4 -11.1(4) . . . . ? 
O1 C1 C11 C12 -10.3(4) . . . . ? 
N1 C1 C11 C12 171.0(2) . . . . ? 
N4 C11 C12 C13 -0.2(3) . . . . ? 
C1 C11 C12 C13 178.0(2) . . . . ? 
N4 C11 C12 C25 177.8(2) . . . . ? 
C1 C11 C12 C25 -4.0(4) . . . . ? 
C11 C12 C13 C14 0.4(3) . . . . ? 
C25 C12 C13 C14 -177.7(2) . . . . ? 
C11 C12 C13 C31 -175.5(2) . . . . ? 
C25 C12 C13 C31 6.3(4) . . . . ? 
C11 N4 C14 C13 0.4(3) . . . . ? 
C11 N4 C14 C15 176.2(2) . . . . ? 
C12 C13 C14 N4 -0.5(3) . . . . ? 
C31 C13 C14 N4 175.0(2) . . . . ? 
C12 C13 C14 C15 -175.2(3) . . . . ? 
C31 C13 C14 C15 0.4(5) . . . . ? 
C16 N5 C15 O2 0.3(4) . . . . ? 
C16 N5 C15 C14 -178.7(2) . . . . ? 
N4 C14 C15 O2 -4.5(3) . . . . ? 
C13 C14 C15 O2 169.8(3) . . . . ? 
N4 C14 C15 N5 174.5(2) . . . . ? 
C13 C14 C15 N5 -11.2(4) . . . . ? 
C23 N6 C16 N5 179.7(2) . . . . ? 
C23 N6 C16 C17 -0.9(4) . . . . ? 
C15 N5 C16 N6 -179.7(2) . . . . ? 
C15 N5 C16 C17 0.8(4) . . . . ? 
N6 C16 C17 C18 -0.3(4) . . . . ? 
N5 C16 C17 C18 179.1(2) . . . . ? 
C16 C17 C18 C19 1.2(4) . . . . ? 
C17 C18 C19 C23 -0.9(4) . . . . ? 
C17 C18 C19 C20 179.9(3) . . . . ? 
C23 C19 C20 C21 1.5(4) . . . . ? 
C18 C19 C20 C21 -179.3(3) . . . . ? 
C19 C20 C21 C22 -0.5(5) . . . . ? 
C23 N7 C22 C21 1.0(5) . . . . ? 
C23 N7 C22 C24 -178.0(3) . . . . ? 
C20 C21 C22 N7 -0.8(5) . . . . ? 
C20 C21 C22 C24 178.2(3) . . . . ? 
C16 N6 C23 N7 -178.6(2) . . . . ? 
C16 N6 C23 C19 1.2(4) . . . . ? 
C22 N7 C23 N6 179.8(3) . . . . ? 
C22 N7 C23 C19 0.1(4) . . . . ? 
C18 C19 C23 N6 -0.3(4) . . . . ? 
C20 C19 C23 N6 179.0(2) . . . . ? 
C18 C19 C23 N7 179.4(2) . . . . ? 
C20 C19 C23 N7 -1.3(4) . . . . ? 
C11 C12 C25 C30 -117.0(3) . . . . ? 
C13 C12 C25 C30 60.8(4) . . . . ? 
C11 C12 C25 C26 70.0(4) . . . . ? 
C13 C12 C25 C26 -112.3(3) . . . . ? 
C30 C25 C26 C27 0.3(4) . . . . ? 
C12 C25 C26 C27 173.4(3) . . . . ? 
C25 C26 C27 C28 0.2(4) . . . . ? 
C26 C27 C28 C29 -0.3(5) . . . . ? 
C27 C28 C29 C30 0.1(5) . . . . ? 
C28 C29 C30 C25 0.4(5) . . . . ? 
C26 C25 C30 C29 -0.5(4) . . . . ? 
C12 C25 C30 C29 -173.9(3) . . . . ? 
C14 C13 C31 C32 -116.4(3) . . . . ? 
C12 C13 C31 C32 58.5(4) . . . . ? 
C14 C13 C31 C36 67.3(4) . . . . ? 
C12 C13 C31 C36 -117.8(3) . . . . ? 
C36 C31 C32 C33 1.2(4) . . . . ? 
C13 C31 C32 C33 -175.3(3) . . . . ? 
C31 C32 C33 C34 -0.3(4) . . . . ? 
C32 C33 C34 C35 -1.6(5) . . . . ? 
C33 C34 C35 C36 2.6(5) . . . . ? 
C34 C35 C36 C31 -1.7(4) . . . . ? 
C32 C31 C36 C35 -0.2(4) . . . . ? 
C13 C31 C36 C35 176.2(2) . . . . ? 
  
loop_ 
 _geom_hbond_atom_site_label_D 
 _geom_hbond_atom_site_label_H 
 _geom_hbond_atom_site_label_A 
 _geom_hbond_distance_DH 
 _geom_hbond_distance_HA 
 _geom_hbond_distance_DA 
 _geom_hbond_angle_DHA 
 _geom_hbond_site_symmetry_A 
N1 H1 O3  0.86 2.04 2.878(2) 162.2 . 
N4 H4 O3  0.94 1.86 2.743(3) 154.4 . 
  
_diffrn_measured_fraction_theta_max    0.999 
_diffrn_reflns_theta_full              25.00 
_diffrn_measured_fraction_theta_full   0.999 
_refine_diff_density_max    1.125 
_refine_diff_density_min   -0.437 
_refine_diff_density_rms    0.047 
